# Supplementary material for: Highly Active Thermophilic L-Asparaginase from Melioribacter roseus Represents a Novel Large Group of Type II Bacterial L-Asparaginases from Chlorobi-Ignavibacteriae-Bacteroidetes Clade
Source: MDPI journal article supplement (doi:10.3390/ijms222413632), 2021-12-20

## Supplementary Material

**Figure S1.** Sequence alignment of type III L-asparaginase from *M. roseus* (MrAIII) (WP\_014855981.1), marked with yellow box, with characterized plant-type L-asparaginases. Conserved catalytic residues are shown in green

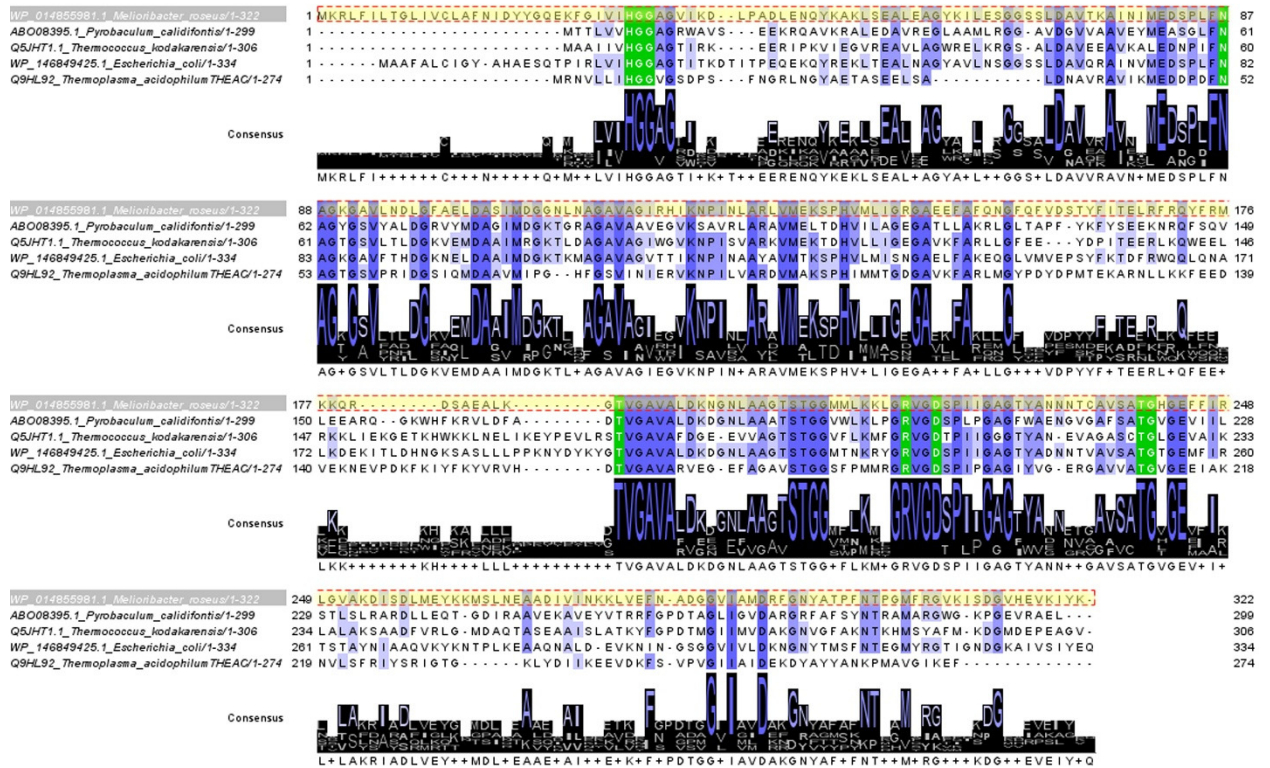

**Figure S2.** Cytotoxic activity of MrAII against cancer cells. Cancer and normal cells were cultivated for 72 h in the presence of different concentrations of the enzyme.

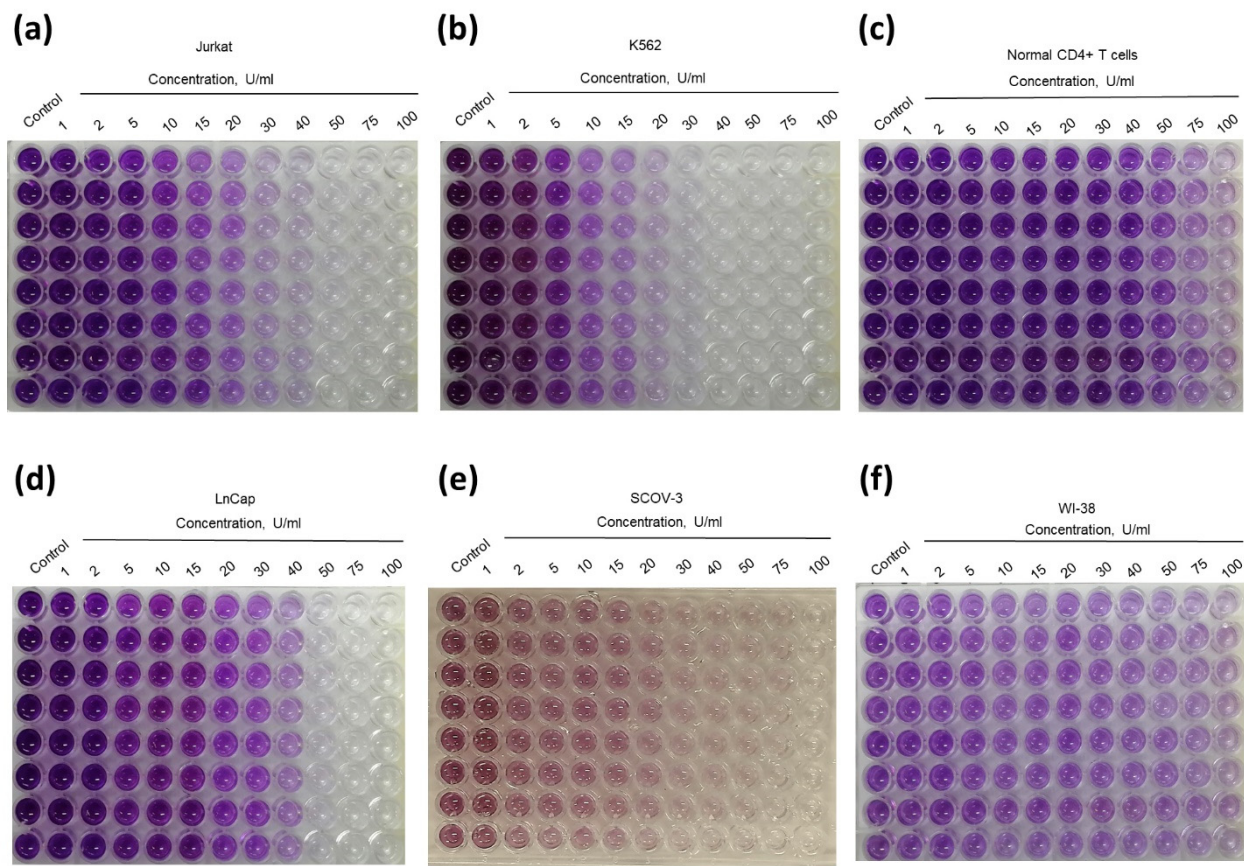

Supplement: s1 [file s1]
